# Supplementary material for: p16 deficiency attenuates intervertebral disc degeneration by adjusting oxidative stress and nucleus pulposus cell cycle
Source: eLife. 2020 Mar 3;9:e52570. doi: 10.7554/eLife.52570 (PMC7065909; doi:10.7554/eLife.52570)
Supplement: Figure 1—figure supplement 2—source data 1. [file elife-52570-fig1-figsupp2-data1.xlsx]

## Sheet: Sheet1
human specimens correlates individually with p16-positive cells (%)
	G2	G3	G4	G5
	6	35	71	92
	7	33	46	72
	7	32	64	66
	10	21	55	82
	11	37	61	88
	13	27	59	75
	12	21	62	96
	8	39	65	84
	5	18	74	76
