# Supplementary material for: p16 deficiency attenuates intervertebral disc degeneration by adjusting oxidative stress and nucleus pulposus cell cycle
Source: eLife. 2020 Mar 3;9:e52570. doi: 10.7554/eLife.52570 (PMC7065909; doi:10.7554/eLife.52570)
Supplement: Figure 1—source data 1. [file elife-52570-fig1-data1.xlsx]

## Sheet: Sheet1
Figure.1A
quantification of p16-positive cells in three-repeat
Group	G2	G3	G4	G5
	5	31	67	86
	10	37	59	79
	8	26	62	82
Figure.1C
	gray-scale value of protein signal
		Area	Mean	Min	Max	IntDen	RawIntDen
p16	G2	2011	83.319	25	153	167555	167555
	G3	2278	121.15	41	184	275979	275979
	G4	2598	154.254	45	197	400752	400752
	G5	3184	181.221	90	204	577008	577008
β-actin	G2	0.031	207.86	144	255	6.506	585542
	G3	0.035	229.622	124	255	8.021	721931
	G4	0.026	232.32	154	255	6.002	540143
	G5	0.038	230.215	142	255	8.764	788718
