# Supplementary material for: p16 deficiency attenuates intervertebral disc degeneration by adjusting oxidative stress and nucleus pulposus cell cycle
Source: eLife. 2020 Mar 3;9:e52570. doi: 10.7554/eLife.52570 (PMC7065909; doi:10.7554/eLife.52570)
Supplement: Figure 2—source data 1. [file elife-52570-fig2-data1.xlsx]

## Sheet: Sheet1
Figure.2B
	gray-scale value of protein signal
		Area	Mean	Min	Max	IntDen	RawIntDen
p16	Control	0.033	83.737	34	123	2.744	246940
	IL-1β	0.032	123.948	57	164	3.994	359448
	IL-1β +P16	0.033	228.601	78	255	7.559	680317
	IL-1β +SiRNA	0.024	40.29	1	71	0.984	88518
β-actin	Control	0.01	215.86	48	255	2.255	202908
	IL-1β	0.008	250.454	161	255	1.948	175318
	IL-1β +P16	0.01	251.77	154	255	2.448	220299
	IL-1β +SiRNA	0.011	245.24	75	255	2.649	238373
Figure.2C
OD450 nm：
Time（h）	0					24					48					72
	OD1	OD2	OD3	mean	SD	OD1	OD2	OD3	mean	SD	OD1	OD2	OD3	mean	SD	OD1	OD2	OD3	mean	SD
Control	1.002	0.998	1.014	1.00467	0.00832666	1.125	1.188	1.205	1.17267	0.0421466	1.305	1.338	1.354	1.33233	0.0249867	1.404	1.405	1.389	1.39933	0.00896289
IL-1β	0.955	1.108	1.068	1.04367	0.0793494	1.125	1.208	1.225	1.186	0.053507	1.105	1.125	1.118	1.116	0.0101489	0.888	0.869	0.859	0.872	0.0147309
IL-1β +P16	1.118	0.995	1.125	1.07933	0.0731186	0.858	0.847	0.819	0.841333	0.020108	0.668	0.705	0.694	0.689	0.019	0.398	0.405	0.427	0.41	0.0151327
IL-1β +SiRNA	1.088	1.068	0.987	1.04767	0.0534821	1.205	1.222	1.238	1.22167	0.0165025	1.185	1.178	1.201	1.188	0.0117898	1.035	1.108	1.124	1.089	0.0474447
Figure.2D
	Percentage of SA-β-gal positive cells (%)
Group	Number1	Number2	Number3	Mean	SD
Control	10.93	10.71	10.48	10.7067	0.183727
IL-1β	54.38	53.33	50.28	52.6633	1.73893
IL-1β+P16	73.68	77.48	75.78	75.6467	1.55421
IL-1β+SiRNA	42.07	42.14	40.88	41.6967	0.578177
Figure.2F
Group	Mean 1	Mean 2	Mean 3	Average	Mean of DCFH-DA(%of Control)
Control	24692	13850	21533	20025	100
IL-1β	30197	29862	27264	29107.7	145
IL-1β+P16	32617	42352	39453	38140.7	190
IL-1β+SiRNA	34213	29638	33710	32520.3	162
Group	G0/G1(%)	S(%)	G2/M(%)
Control	44.5	27.5	27.99
IL-1β	53.56	24.99	21.45
IL-1β +P16	65.21	16.16	18.64
IL-1β +SiRNA	50.68	27.53	21.79
