# Supplementary material for: p16 deficiency attenuates intervertebral disc degeneration by adjusting oxidative stress and nucleus pulposus cell cycle
Source: eLife. 2020 Mar 3;9:e52570. doi: 10.7554/eLife.52570 (PMC7065909; doi:10.7554/eLife.52570)
Supplement: Figure 3—source data 1. [file elife-52570-fig3-data1.xlsx]

## Sheet: Sheet1
Figure.3B
	gray-scale value of protein signal
		Area	Mean	Min	Max	IntDen	RawIntDen
p16	Control	0.007	91.289	66	114	0.649	233518
	IL-1β	0.007	174.68	111	219	1.25	450151
	IL-1β +rapa	0.008	126.74	57	172	1.039	374009
β-actin	Control	0.024	249.477	126	255	6.101	549099
	IL-1β	0.023	253	174	255	5.839	525481
	IL-1β +rapa	0.023	250.422	136	255	5.762	518624
Figure.3E
	Percentage of SA-β-gal positive cells (%)
Group	Number1	Number2	Number3	Mean	SD
Control	12.03	13.56	11.97	12.52	0.735799
IL-1β	45.22	43.88	41.05	43.3833	1.73824
IL-1β+RAP	20.56	22.75	25.22	22.8433	1.90358
Figure.3G
Group	Mean 1	Mean 2	Mean 3	Average	Mean of DCFH-DA(%of Control)
Control	23589	20058	22038	21895	100
IL-1β	30197	31588	29865	30550	140
IL-1β+Rap	26584	26786	27018	26796	122
Group	G0/G1(%)	S(%)	G2/M(%)
Control	46.82	25.97	27.21
	42.48	29.79	27.73
	43.51	32.06	24.43
IL-1β	70.43	15.68	13.89
	67.83	17.66	14.51
	68.8	18.18	13.02
IL-1β +Rap	58.72	19.82	21.46
	60.11	19	20.89
	57.35	21.44	21.21
Figure.3I
OD450nm
Time（h）	0					24					48					72
	OD1	OD2	OD3	mean	SD	OD1	OD2	OD3	mean	SD	OD1	OD2	OD3	mean	SD	OD1	OD2	OD3	mean	SD
Control	1.003	0.999	1.012	1.00467	0.00665833	1.124	1.187	1.204	1.17167	0.0421466	1.304	1.334	1.352	1.33	0.0242487	1.404	1.406	1.388	1.39933	0.00986577
IL-1β	0.998	1.003	1.002	1.001	0.00264575	1.085	1.086	1.088	1.08633	0.00152753	0.986	0.988	0.985	0.986333	0.00152753	0.652	0.655	0.651	0.652667	0.00208167
IL-1β +Rap	1.088	1.068	0.987	1.04767	0.0534821	1.184	1.186	1.187	1.18567	0.00152753	1.185	1.178	1.201	1.188	0.0117898	0.999	0.975	0.901	0.958333	0.0510816
