# Supplementary material for: p16 deficiency attenuates intervertebral disc degeneration by adjusting oxidative stress and nucleus pulposus cell cycle
Source: eLife. 2020 Mar 3;9:e52570. doi: 10.7554/eLife.52570 (PMC7065909; doi:10.7554/eLife.52570)
Supplement: Figure 4—figure supplement 3—source data 1. [file elife-52570-fig4-figsupp3-data1.xlsx]

## Sheet: Sheet1
Pffirmann Grade of the degenerated disc from the mice specimens
Group	WT	p16 KO	WT+TS	p16 KO+TS
	1	1	2	3
	1	1	3	4
	3	1	4	4
	2	1	4	2
	1	3	3	2
	4	2	4	2
	3	2	4	2
	1	1	3	1
	2	2	3	3
	4	1	4	5
	2	3	4	3
	1	1	4	2
	3	2	4	5
	2	3	5	2
	2	1	5	1
