# Supplementary material for: p16 deficiency attenuates intervertebral disc degeneration by adjusting oxidative stress and nucleus pulposus cell cycle
Source: eLife. 2020 Mar 3;9:e52570. doi: 10.7554/eLife.52570 (PMC7065909; doi:10.7554/eLife.52570)
Supplement: Figure 4—source data 1. [file elife-52570-fig4-data1.xlsx]

## Sheet: Sheet1
Figure.4B
quantification of Sfranin O-positive area in three-repeat
Group	G2	G3	G4	G5
	0.452	0.862	0.372	0.76
	0.427	0.798	0.482	0.69
	0.502	0.822	0.43	0.65
Figure.4C
Segment	T13				L1				L2				L3				L4				L5
Group	Vertebra	disc	DHI		Vertebra	disc	DHI		Vertebra	disc	DHI		Vertebra	disc	DHI		Vertebra	disc	DHI		Vertebra	disc	DHI
WT-1	45.9319	6.2532	0.119827		54.4236	5.6008	0.0933087		60.9497	5.8222	0.0871954		61.4056	5.824	0.0866285		63.3876	6.5079	0.093109		63.3735	7.0545	0.100166
WT-2	47.1291	5.5265	0.104956		55.7479	5.6723	0.0923524		61.8749	5.6966	0.0843048		63.4543	5.5632	0.0806056		63.797	6.1716	0.0882053		63.305	6.5287	0.0934892
WT-3	46.3414	5.5983	0.107785		55.671	5.8644	0.0953012		59.364	6.3476	0.0965979		59.5072	6.1318	0.093417		61.9367	6.2616	0.0918146		61.525	7.6782	0.110952
WT-4	49.4111	6.346	0.113815		57.4536	6.2036	0.0974532		62.4591	6.0767	0.0886646		63.0395	6.917	0.0988757		63.7864	6.3704	0.0908023		62.4276	6.6466	0.0962241
P16-1	50.5513	7.1326	0.12365		58.3836	6.9195	0.10596		65.0681	6.3738	0.0892166		69.5595	6.4609	0.084989		65.0145	6.5443	0.0914535		66.8041	9.0859	0.119725
P16-2	49.3683	6.3534	0.11402		56.7989	6.2513	0.099148		63.378	6.4372	0.0922034		66.8321	6.1583	0.0843714		68.9639	6.5572	0.0868261		68.9401	9.1257	0.116898
P16-3	48.3937	7.2262	0.129921		50.9179	6.7512	0.117068		61.5248	7.6977	0.111202		62.0774	6.8958	0.099978		62.3671	7.1943	0.103424		62.5824	9.3373	0.12983
P16-4	47.5605	6.9479	0.127465		55.3133	7.3402	0.117155		61.9975	6.9887	0.101306		64.0425	6.6388	0.0939258		67.3908	6.365	0.0862983		67.77	8.3048	0.109166
WT-TS1	48.5863	4.762	0.0892625		55.9145	4.8639	0.0800268		60.9206	5.5662	0.0837189		62.6437	5.1997	0.0766427		62.1954	5.2243	0.0774892		63.1489	5.0915	0.0746112
WT-TS2	47.4432	5.0833	0.0967759		54.1852	5.351	0.0898781		59.6057	5.1017	0.0788426		59.8907	4.7229	0.0730945		60.8513	5.6229	0.0845877		61.9565	5.1927	0.0773308
WT-TS3	48.3109	5.75	0.106362		55.7923	5.4182	0.0885175		61.8079	4.7973	0.0720259		63.8175	4.6207	0.0675164		64.0755	5.1277	0.0740963		64.1168	4.7678	0.0692143
WT-TS4	49.6959	5.6745	0.102483		55.9616	5.2354	0.0855499		60.5207	4.2308	0.065339		62.7428	4.9796	0.0735296		63.5273	5.5971	0.0809714		64.3957	4.5318	0.0657473
WT-TS5	49.1811	5.5	0.100583		55.8354	5.5868	0.0909573		61.3456	5.1776	0.0778315		61.7803	4.9259	0.0738447		62.9718	4.5017	0.066718		62.1516	5.0856	0.0756367
P16-TS1	50.9785	5.6833	0.100302		59.7166	5.9415	0.0904915		64.3004	4.9201	0.0710787		67.4589	6.0157	0.0818746		67.5779	6.4148	0.086695		66.8399	7.6605	0.102825
P16-TS2	52.5223	6.1667	0.105074		60.6723	4.9231	0.0750525		67.2838	4.3892	0.0612392		67.5562	5.3158	0.0729471		69.5188	5.3788	0.0718154		67.7047	6.5331	0.0880023
P16-TS3	50.9602	6.4181	0.111856		57.5736	6.1824	0.0969697		64.9926	5.8825	0.0829981		68	5.5637	0.0756311		68.775	5.97	0.0798716		67.8366	6.8676	0.0919306
P16-TS4	50.3413	6.0833	0.107813		58.9719	6.2101	0.0952732		62.492	5.4415	0.0801004		62.5841	5.8141	0.0850037		65.5431	6.5769	0.0911938		61.4126	7.3106	0.106377
P16-TS5	49.0628	5.1972	0.0957833		56.113	5.3372	0.0868541		62.765	4.8112	0.0711967		64.5129	5.195	0.0745253		65.4374	6.1476	0.0858783		66.175	6.1997	0.0856611
Figure.4D
	gray-scale value of protein signal													Area	Mean	Min	Max	IntDen	RawIntDen
		Area	Mean	Min	Max	IntDen	RawIntDen					collagen Ⅰ	WT	0.009	147.655	83	203	1.265	113842
β-actin	WT	0.009	247.345	137	255	2.339	210491						p16 KO	0.004	204.218	132	255	0.717	64533
	p16 KO	0.01	249.805	102	255	2.409	216831						WT+TS	0.009	253.938	199	255	2.274	204674
	WT+TS	0.009	247.004	140	255	2.135	192169						p16 KO+TS	0.006	195.134	100	255	1.119	100689
	p16 KO+TS	0.008	250.616	143	255	2.083	187461
												collagen Ⅹ	WT	0.008	246.276	162	255	1.896	170669
collagen Ⅱ	WT	0.015	114.365	34	179	1.737	156337						p16 KO	0.004	115.019	96	145	0.479	43132
	p16 KO	0.013	247.145	123	255	3.246	292125						WT+TS	0.008	236.376	168	255	1.988	178937
	WT+TS	0.01	83.092	49	114	0.805	72456						p16 KO+TS	0.004	204.587	163	255	0.793	71401
	p16 KO+TS	0.008	173.319	87	224	1.315	118377
												MMP-3	WT	0.005	252.377	178	255	1.175	105746
p65	WT	0.009	159.527	92	235	1.36	122357						p16 KO	0.005	164.443	80	226	0.797	71697
	p16 KO	0.011	68.217	29	127	0.781	70263						WT+TS	0.006	236.454	147	255	1.332	119882
	WT+TS	0.008	244.097	183	255	1.98	178191						p16 KO+TS	0.004	226.711	132	255	0.854	76855
	p16 KO+TS	0.011	111.166	57	157	1.222	109943
MMP-13	WT	0.009	169.031	74	255	1.471	132351
	p16 KO	0.007	130.969	90	167	0.93	83689
	WT+TS	0.009	248.567	181	255	2.348	211282
	p16 KO+TS	0.007	131.699	50	182	0.903	81258
Figure.4G
IL-1β
MULTISKAN MS PRIMARY EIA V. 1.5-0
ABSORBANCE MODE
CONTINUOUS MOVEMENT
FILTER 450
SINGLE WELL BLANK 0.033
BLANK WELL A6
ABSORBANCES
	1	2	3	4	5	6	7	8	9	10	11	12
A	1.759	1.087	0.545	0.278	0.152	0	0.383	0.313	0.306	0.336	0.322	0.435
B	0.305	0.411	0.466	0.329	0.444	0.283	0.294	0.38	0.441	0.315	0.412	0.37
C	0.443	0.457	0.301	0.293	0.424	0.413	0.455	0.451	0.361	0.348	0.474	0.468
D	0.42	0.41	0.372	0.369	0.277	0.271	0.343	0.314
（ng/L)
A	459.107	285.766	145.958	77.0855	44.5841	5.37591	104.17	86.1137	84.3081	92.0465	88.4353	117.583
B	84.0501	111.393	125.58	90.2409	119.905	78.3753	81.2127	103.396	119.131	86.6296	111.651	100.817
C	119.647	123.258	83.0183	80.9548	114.746	111.909	115.327	93.8186	98.4952	95.1419	127.643	126.096
D	129.87	104.946	101.333	100.559	76.8276	75.2799	93.8522	86.3717
WT	114.746	111.909	115.327
p16 KO	98.4952	95.1419	93.8186
WT+TS	127.643	126.096	129.87
p16 KO+TS	101.333	100.559	104.946
IL-6
MULTISKAN MS PRIMARY EIA V. 1.5-0
ABSORBANCE MODE
CONTINUOUS MOVEMENT
FILTER 450
SINGLE WELL BLANK 0.037
BLANK WELL A6
	1	2	3	4	5	6	7	8	9	10	11	12
A	1.704	1.036	0.497	0.235	0.111	0	0.261	0.269	0.361	0.423	0.446	0.42
B	0.276	0.28	0.45	0.245	0.322	0.31	0.385	0.275	0.435	0.309	0.306	0.257
C	0.241	0.307	0.334	0.326	0.409	0.433	0.263	0.253	0.344	0.349	0.302	0.296
D	0.342	0.354	0.366	0.323	0.4	0.405	0.252	0.401
（ng/L)
A	459.321	285.575	145.382	77.2368	44.9847	16.1138	83.9994	86.0802	110.009	126.135	132.118	125.355
B	87.9009	88.9412	133.158	79.8378	103.507	97.8161	116.252	87.6408	129.256	96.4841	95.7038	82.959
C	78.7974	96.9058	102.987	101.946	122.494	128.736	84.5196	81.9186	105.588	106.888	94.6634	93.1028
D	105.067	108.188	110.628	100.125	120.153	121.453	79.2191	120.413
WT	102.987	96.9058	101.946
p16 KO	84.5196	81.9186	79.2191
WT+TS	105.067	108.189	110.628
p16 KO+TS	103.507	100.126	97.8161
TNF-α
MULTISKAN MS PRIMARY EIA V. 1.5-0
ABSORBANCE MODE
CONTINUOUS MOVEMENT
FILTER 450
SINGLE WELL BLANK 0.038
BLANK WELL A6
	1	2	3	4	5	6	7	8	9	10	11	12
A	1.762	1.086	0.524	0.267	0.138	0	0.353	0.285	0.28	0.363	0.325	0.35
B	0.36	0.331	0.367	0.45	0.283	0.4	0.388	0.455	0.449	0.336	0.352	0.491
C	0.324	0.34	0.315	0.304	0.308	0.298	0.344	0.337	0.327	0.369	0.341	0.354
D	0.419	0.432	0.42	0.355	0.376	0.367	0.29	0.326
A	2448.16	1529.35	765.483	416.171	240.835	53.2669	533.061	440.636	433.84	546.653	495.004	528.984
B	542.576	503.159	552.09	664.903	437.918	596.943	580.633	671.699	663.544	509.955	531.702	720.63
C	493.645	515.392	481.412	466.461	471.898	458.306	520.829	511.314	500.629	554.809	516.751	534.421
D	622.768	640.438	633.639	535.78	564.323	556.168	447.432	496.363
（ng/L)
WT	481.412	466.461	471.898
p16 KO	520.829	511.314	500.629
WT+TS	633.639	622.768	640.438
p16 KO+TS	556.168	535.78	564.323
Figure.4H
modified Thompson classification
Group	WT	p16 KO	WT+TS	p16 KO+TS
	1	1	2	1
	1	1	3	2
	1	1	3	2
	3	1	4	2
	2	2	3	3
	1	1	3	2
	1	1	3	1
	1	1	3	2
	3	2	4	2
	2	3	2	3
