# Supplementary material for: p16 deficiency attenuates intervertebral disc degeneration by adjusting oxidative stress and nucleus pulposus cell cycle
Source: eLife. 2020 Mar 3;9:e52570. doi: 10.7554/eLife.52570 (PMC7065909; doi:10.7554/eLife.52570)
Supplement: Figure 5—source data 1. [file elife-52570-fig5-data1.xlsx]

## Sheet: Sheet1
Figure.5A
quantification of positive cells in three-repeat
		Mean	SD	N						Mean	SD	N
8-OH	WT	41.31	3.87	3				β-gal	WT	35.81	2.83	3
	p16 KO	14.26	4.12	3					p16 KO	13.81	5.23	3
	WT+TS	76.23	4.25	3					WT+TS	82.71	4.28	3
	p16 KO+TS	52.31	4.29	3					p16 KO+TS	23.86	2.98	3
		Mean	SD	N						Mean	SD	N
Ki67	WT	56.81	4.18	3				PCNA	WT	28.23	1.41	3
	p16 KO	78.12	3.41	3					p16 KO	63.18	2.87	3
	WT+TS	31.24	2.71	3					WT+TS	18.87	3.13	3
	p16 KO+TS	43.15	5.93	3					p16 KO+TS	32.78	4.1	3
Figure.5B
Group	Green fluorescence(%)				Group	Green fluorescence(%)				Group	G1(%)	S(%)	G2(%)
WT-1	11.58				WT-1	2.88				WT-1	83.64	14.23	2.13
WT-2	9.77				WT-2	2.77				WT-2	83.86	14.75	1.39
p16-1	6.32				p16-1	3.15				p16-1	77.81	18.48	3.71
p16-2	6.68				p16-2	2.82				p16-2	76.53	19.88	3.59
WT-TS-1	16.2				WT-TS-1	2.75				WT-TS-1	83.16	16.84	0
WT-TS-2	13.02				WT-TS-2	2.56				WT-TS-2	83.47	15.57	0.96
p16-TS-1	10.98				p16-TS-1	2.78				p16-TS-1	82.38	14.27	3.35
p16-TS-2	11.52				p16-TS-2	3.1				p16-TS-2	82.45	15.01	2.54
Figure.5C
	gray-scale value of protein signal
		Area	Mean	Min	Max	IntDen	RawIntDen								Area	Mean	Min	Max	IntDen	RawIntDen
β-actin-1	WT	0.004	239.534	157	255	0.878	315945						IGF1	WT	0.008	200.381	112	255	1.697	152690
	p16 KO	0.004	231.805	141	255	0.946	340521							p16 KO	0.007	252.572	195	255	1.771	159373
	WT+TS	0.004	242.473	147	255	0.874	314730							WT+TS	0.008	140.876	81	196	1.125	101290
	p16 KO+TS	0.003	248.753	179	255	0.852	306713							p16 KO+TS	0.008	222.471	133	255	1.861	167521
													p19
VEGF	WT	0.004	251.861	180	255	0.965	86892							WT	0.007	216.928	125	255	1.531	137749
	p16 KO	0.003	163.165	107	193	0.484	43565							p16 KO	0.005	177.738	147	205	0.912	82115
	WT+TS	0.004	253.702	195	255	0.964	86766							WT+TS	0.008	249.438	198	255	2.02	181840
	p16 KO+TS	0.003	254.936	240	255	0.669	60165							p16 KO+TS	0.005	243.874	166	255	1.225	110231
p53	WT	0.005	49.71	13	86	0.272	24507						sirt1	WT	0.004	157.35	70	255	0.64	57590
	p16 KO	0.005	36.218	17	59	0.185	16624							p16 KO	0.004	235.948	130	255	0.907	81638
	WT+TS	0.01	110.746	22	255	1.159	104323							WT+TS	0.003	131.208	93	174	0.413	37132
	p16 KO+TS	0.005	121.956	32	250	0.55	49514							p16 KO+TS	0.003	173.75	75	249	0.579	52125
sod1	WT	0.004	218.909	101	255	0.881	79245						sod2	WT	0.005	245.181	183	255	1.218	109596
	p16 KO	0.007	249.021	178	255	1.807	162611							p16 KO	0.006	253.414	206	255	1.428	128481
	WT+TS	0.004	173.135	123	202	0.712	64060							WT+TS	0.003	199.425	154	249	0.558	50255
	p16 KO+TS	0.005	234.396	154	255	1.263	113682							p16 KO+TS	0.003	217.142	126	255	0.663	59714
CDK4	WT	0.006	207.688	97	255	1.237	111321						CDK6	WT	0.008	89.712	34	129	0.723	65041
	p16 KO	0.007	228.121	104	255	1.587	142804							p16 KO	0.008	235.952	125	255	1.964	176728
	WT+TS	0.003	244.348	143	255	0.749	67440							WT+TS	0.008	42.032	14	68	0.349	31440
	p16 KO+TS	0.003	240.344	150	255	0.839	75468							p16 KO+TS	0.006	220.57	116	255	1.316	118446
Rb	WT	0.008	225.748	115	255	1.864	167731						pRb	WT	0.006	109.5	73	154	0.706	63510
	p16 KO	0.006	183.938	127	235	1.026	92337							p16 KO	0.007	232.349	107	255	1.626	146380
	WT+TS	0.007	236.243	137	255	1.753	157810							WT+TS	0.007	62.38	30	89	0.412	37116
	p16 KO+TS	0.007	229.913	126	255	1.548	139327							p16 KO+TS	0.007	237.046	124	255	1.559	140331
E2F1	WT	0.006	87.221	58	110	0.545	49018						E2F2	WT	0.008	91.875	42	126	0.717	64496
	p16 KO	0.006	237.983	149	255	1.367	123037							p16 KO	0.009	236.462	114	255	2.128	191534
	WT+TS	0.009	22.55	9	33	0.199	17950							WT+TS	0.008	65.31	53	83	0.525	47219
	p16 KO+TS	0.007	193.616	82	255	1.304	117331							p16 KO+TS	0.008	238.827	157	255	1.977	177926
β-actin-2	WT	0.003	232.131	73	255	0.745	67086
	p16 KO	0.004	235.367	123	255	0.983	88498
	WT+TS	0.003	211.231	50	255	0.723	65059
	p16 KO+TS	0.004	246.951	129	255	1.01	90878
