# Supplementary material for: p16 deficiency attenuates intervertebral disc degeneration by adjusting oxidative stress and nucleus pulposus cell cycle
Source: eLife. 2020 Mar 3;9:e52570. doi: 10.7554/eLife.52570 (PMC7065909; doi:10.7554/eLife.52570)
Supplement: Figure 6—figure supplement 1—source data 1. [file elife-52570-fig6-figsupp1-data1.xlsx]

## Sheet: Sheet1
	Group	Fluc	RLuc	Fluc/Rluc	M	SD
1. pcDNA3.1-vector+pGL4.23 +refer	1	9029.09	5536.26	1.6309	1.63088	0.0506522
	2	9332.1	5905.57	1.58022
	3	9570.33	5691.46	1.68153
2. pcDNA3.1-vector+pGL4.23-promoter2-wt+refer	1	8883.87	4489.65	1.97874	1.82335	0.134671
	2	8576.25	4927.39	1.74053
	3	8302.06	4741.91	1.75078
3. pcDNA3.1-vector+pGL4.23-promoter2-mut +refer	1	8730.72	4572.91	1.90922	1.79462	0.102698
	2	8211.88	4655.98	1.76373
	3	8433.01	4928.93	1.71092
4.pcDNA3.1-NFkB+pGL4.23 +refer	1	7417.93	4642.98	1.59767	1.61094	0.138807
	2	7868.46	4481.14	1.75591
	3	7617.35	5149.47	1.47925
5.pcDNA3.1-NFkB+pGL4.23-promoter2-wt+refer	1	10509.5	4363.57	2.40846	2.26101	0.234954
	2	9184.38	4615.14	1.99006
	3	11011.8	4618.07	2.3845
6.pcDNA3.1-NFkB+pGL4.23-promoter2-mut +refer	1	8731.45	4177.36	2.09018	1.87126	0.196284
	2	8351.89	4607.6	1.81263
	3	8583.25	5016.58	1.71098
	3	8501.83	4112.95	2.06709
