# Supplementary material for: p16 deficiency attenuates intervertebral disc degeneration by adjusting oxidative stress and nucleus pulposus cell cycle
Source: eLife. 2020 Mar 3;9:e52570. doi: 10.7554/eLife.52570 (PMC7065909; doi:10.7554/eLife.52570)
Supplement: Figure 6—source data 1. [file elife-52570-fig6-data1.xlsx]

## Sheet: Sheet1
	Group	Fluc	RLuc	Fluc/Rluc	M	SD
1. pcDNA3.1-vector+pGL4.23 +refer	1	9029.09	5536.26	1.6309	1.63088	0.0506522
	2	9332.1	5905.57	1.58022
	3	9570.33	5691.46	1.68153
2. pcDNA3.1-vector+pGL4.23-promoter1-wt+refer	1	8233.82	4510.34	1.82554	1.87758	0.221925
	2	8790.69	4144.8	2.1209
	3	8224.12	4877.04	1.68629
3. pcDNA3.1-vector+pGL4.23-promoter1-mut +refer	1	8018.66	4669.7	1.71717	1.70372	0.0809094
	2	8162.96	5048.46	1.61692
	3	8536.08	4803.5	1.77705
4.pcDNA3.1-NFkB+pGL4.23 +refer	1	7417.93	4642.98	1.59767	1.61094	0.138807
	2	7868.46	4481.14	1.75591
	3	7617.35	5149.47	1.47925
5.pcDNA3.1-NFkB+pGL4.23-promoter1-wt+refer	1	22196.7	3908.44	5.67917	5.90957	0.430759
	2	23828.1	4222.59	5.643
	3	22882	3571.68	6.40653
6.pcDNA3.1-NFkB+pGL4.23-promoter1-mut +refer	1	8950.6	4056.09	2.20671	2.07188	0.132497
	2	8419.12	4335.64	1.94184
	3	8501.83	4112.95	2.06709
